# Supplementary material for: PEO Infiltration of Porous Garnet-Type Lithium-Conducting Solid Electrolyte Thin Films
Source: MDPI journal article supplement (doi:10.3390/ceramics4030031), 2021-07-23
Supplement: s1 [file s1]

**Electronic Supplementary Information**  
**for**  
**PEO Infiltration of Porous Garnet-Type Lithium-Conducting Solid Electrolyte Thin**  
**Films**

Aamir Iqbal Waidha <sup>1,2</sup>, Vanita Vanita <sup>1,2</sup>, Oliver Clemens <sup>1,2,\*</sup>

<sup>a</sup> Materials Synthesis Group, Institute for Materials Science, University of Stuttgart,  
Heisenbergstraße 3, 70569 Stuttgart, Germany

<sup>b</sup> Institut für Materialwissenschaft, Fachgebiet Materialdesign durch Synthese,  
Technische Universität Darmstadt, 64287 Darmstadt, Germany

\* Corresponding Author:

Fax: +49 711 685 51933

E-Mail: [oliver.clemens@imw.uni-stuttgart.de](mailto:oliver.clemens@imw.uni-stuttgart.de)

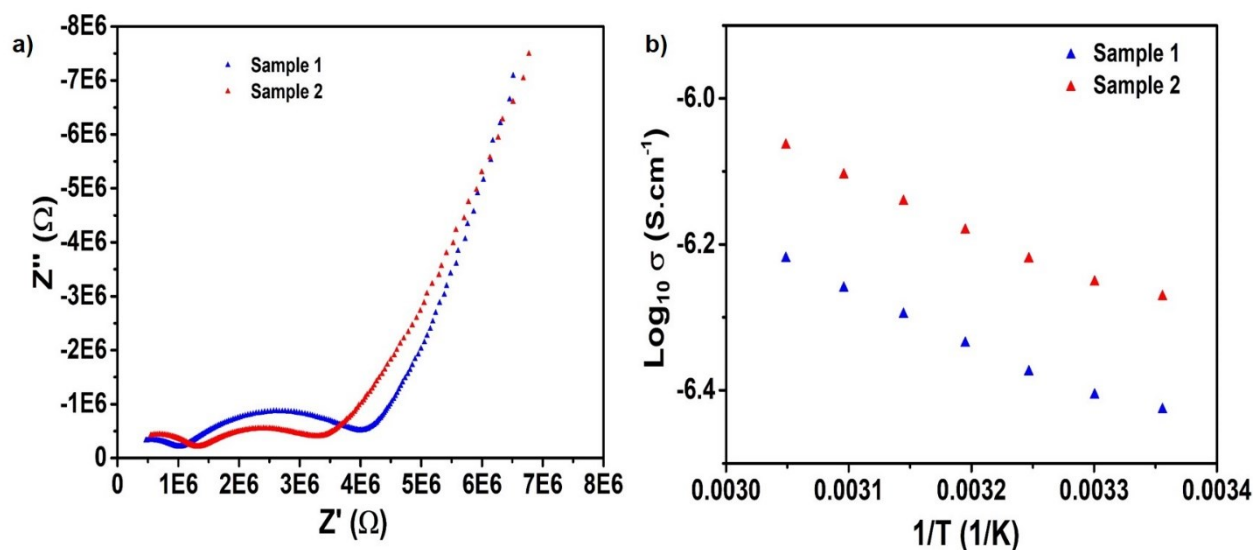

Figure S1: a) Nyquist plot for two different infiltrated cubic Al-doped garnet films measured at 298 K. b) Temperature dependent Arrhenius plot measured for the two different Al-doped garnet films measured in the temperature range of 298 K to 328 K

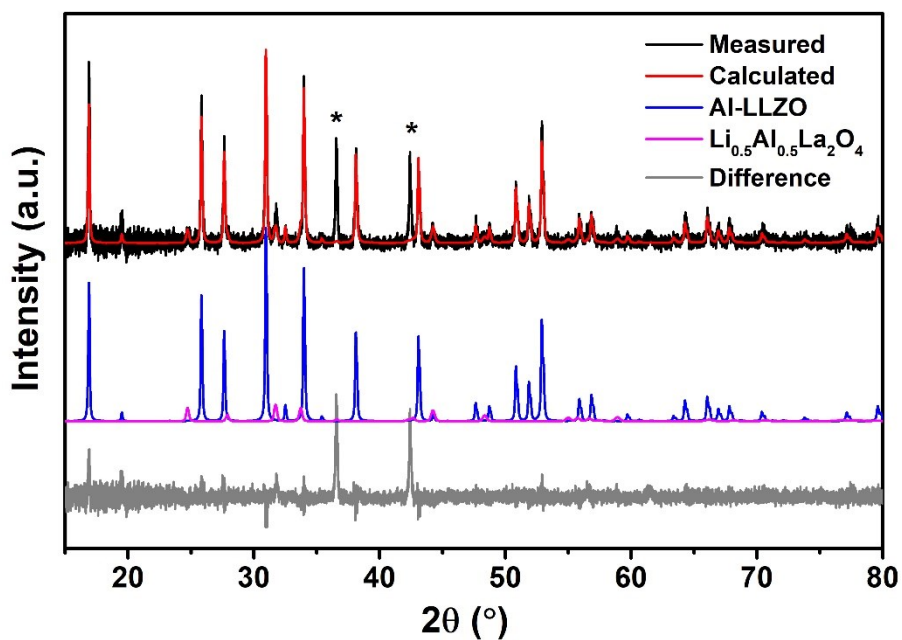

Figure S2: Rietveld fit of the X-ray diffractogram of the Al-doped LLZO garnet thin film annealed for 240 minutes

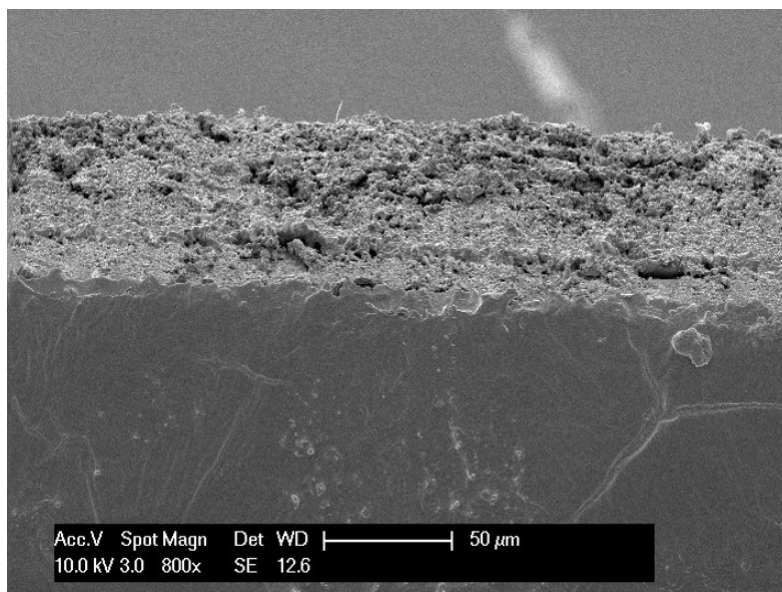

*Figure S3: Cross sectional view of the garnet thin film.*

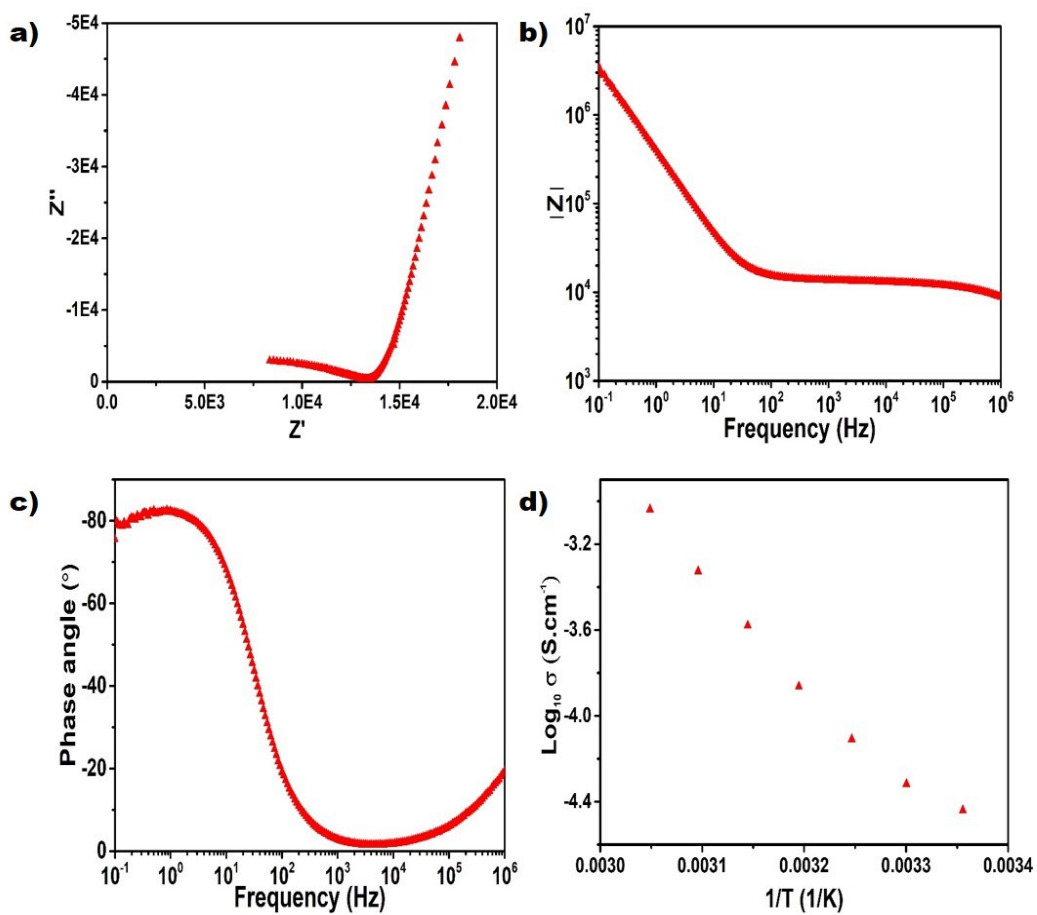

Figure S4: Impedance measurements carried out for the PEO thin film at 298 K
