# Supplementary material for: PEO Infiltration of Porous Garnet-Type Lithium-Conducting Solid Electrolyte Thin Films
Source: MDPI journal article supplement (doi:10.3390/ceramics4030031), 2021-07-23
Supplement: s1 [file s1]

Archive with 1 entries (1 files):
- ceramics-1214683-supplementary.pdf
